# Supplementary material for: Innate Immunity and the Inter-exposure Interval Determine the Dynamics of Secondary Influenza Virus Infection and Explain Observed Viral Hierarchies
Source: PubMed Central journal article supplement (PMC4540579; doi:10.1371/journal.pcbi.1004334), 2015-08-18

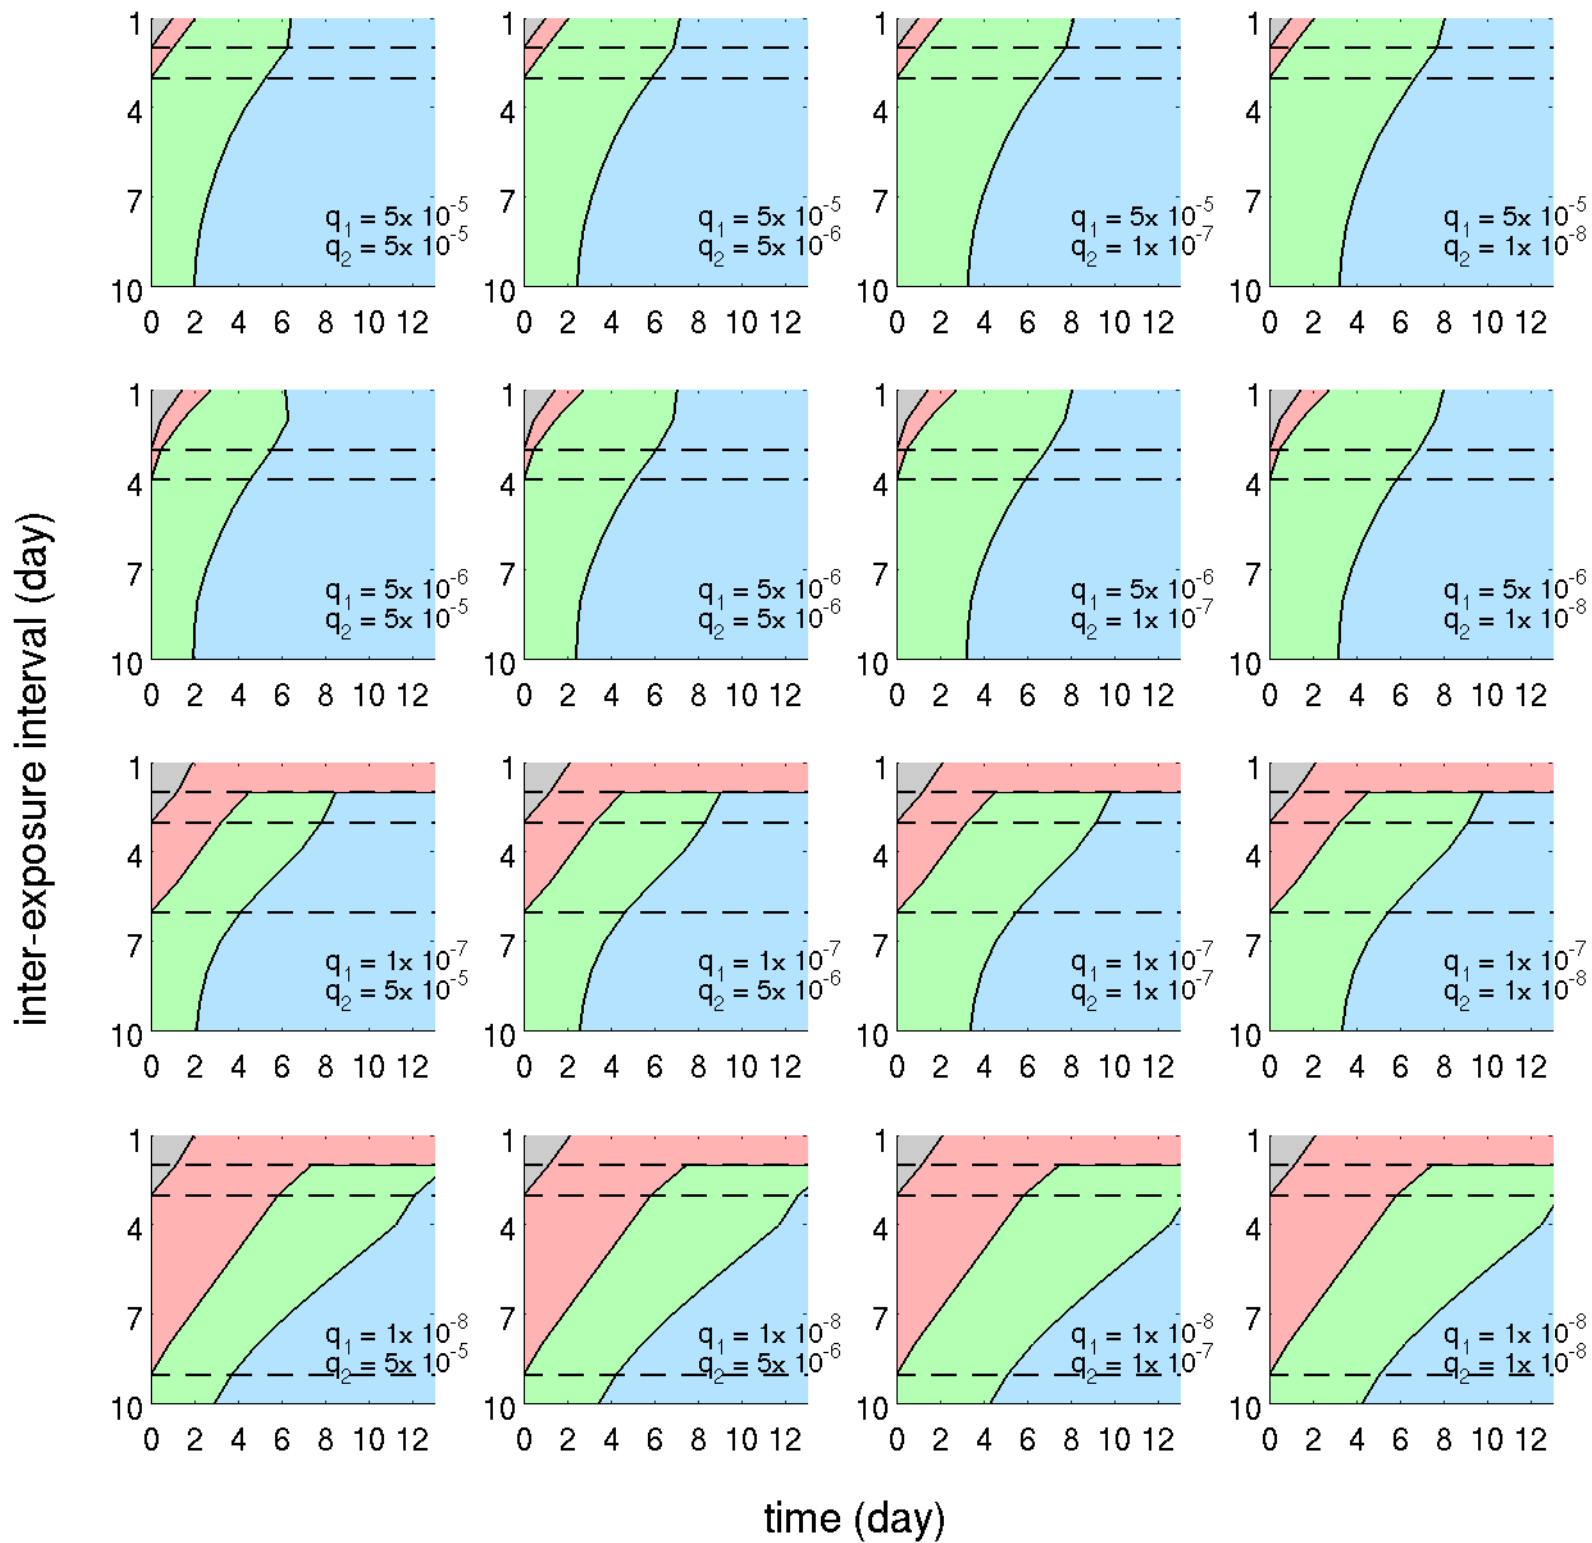

Supplement: pcbi.1004334.s013.pdf [file pcbi.1004334.s013.pdf]
